# Supplementary material for: A Light-Powered Micropump with Dynamic Collective Behavior for Reparation
Source: MDPI journal article supplement (doi:10.3390/nano14060517), 2024-03-14
Supplement: s1 [file s1]

## Supporting information

# A Light-Powered Micropump with Dynamic Collective Behavior for Reparation

Yunyu Sun<sup>1, 2, 3, #</sup>, Hao Wang<sup>1, #</sup>, Jiwei Jiang<sup>1, \*</sup>, Hui Zhang<sup>1</sup>, Limei Liu<sup>4</sup>, Keying Zhang<sup>3</sup>, Bo Song<sup>5</sup>  
and Bin Dong<sup>1, \*</sup>

<sup>1</sup> Institute of Functional Nano & Soft Materials (FUNSOM), Jiangsu Key Laboratory for Carbon-Based Functional Materials & Devices, Soochow University, Suzhou 215123, China; sunyunyu2008@ahszu.edu.cn (Y.S.); hwang415@stu.suda.edu.cn (H.W.); jwjiang@suda.edu.cn (J.J.); huizhang@suda.edu.cn (H.Z.); bdong@suda.edu.cn (B.D.)

<sup>2</sup> School of Electronic Science & Engineering, Southeast University, Nanjing, 210096, China

<sup>3</sup> Anhui Key Laboratory of Spin Electron and Nanomaterials of Anhui Higher Education Institutes, School of Chemistry and Chemical Engineering, Suzhou University, Suzhou 234000, China; szxyzky2009@ahszu.edu.cn.

<sup>4</sup> College of Mechanical Engineering, Yangzhou University, Yangzhou 225127, China; limeiliu@yzu.edu.cn (L.L.)

<sup>5</sup> Laboratory of Advanced Optoelectronic Materials, College of Chemistry, Chemical Engineering and Materials Science, Soochow University, Suzhou 215123, China; songbo@suda.edu.cn

**Video S1.** The pumping behavior of the pentacene micropump driven by light. Light intensity  $0.6 \text{ W/cm}^2$ .  $20 \times$  speed.

**Video S2.** The pumping behavior of the trace particles in the NaCl solution. Light intensity  $1.2 \text{ W/cm}^2$ .  $10 \times$  speed.

**Video S3.** The pumping direction of the trace particles with positive or neutral charge. Light intensity  $1.2 \text{ W/cm}^2$ .  $30 \times$  speed.

**Video S4.** The aggregation of tracer particles on the focus spot in a system consisting of two adjacent pentacene micropumps. Light intensity  $1.2 \text{ W/cm}^2$ .  $50 \times$  speed.

**Video S5.** The dynamic movement of the aggregation tuned by the light. Light intensity  $1.2 \text{ W/cm}^2$ .  $50 \times$  speed.

**Video S6.** The application of pumping in crack reparation based on pentacene micropump. Light intensity  $1.2 \text{ W/cm}^2$ .  $10 \times$  speed.

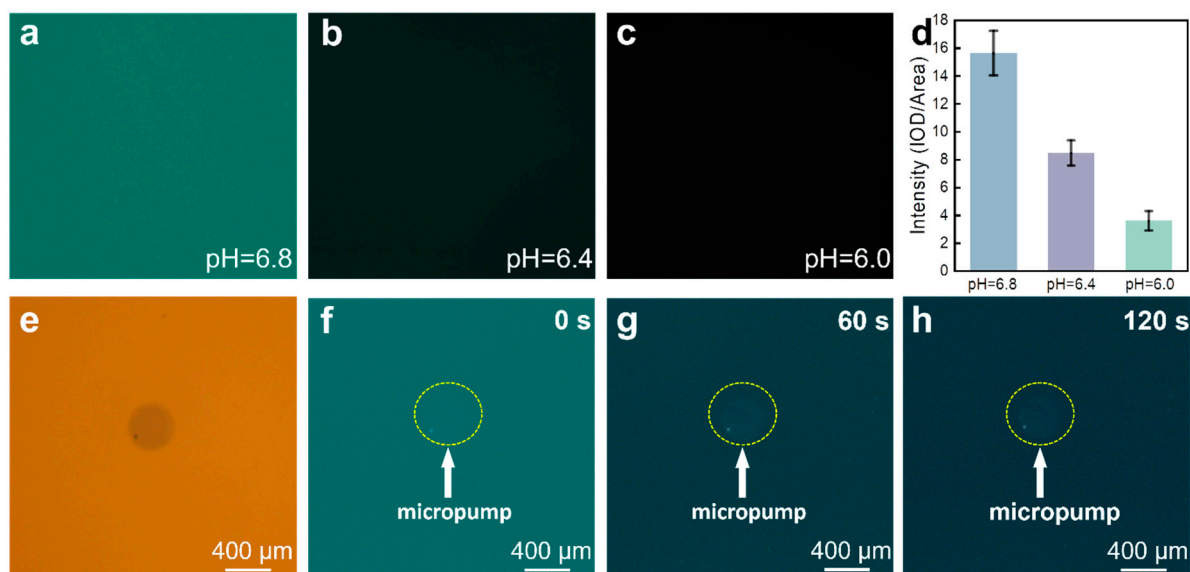

**Figure S1.** (a-d) The fluorescence images and intensity of the pH indicator with different pH. (e-h)

The change of fluorescence images of the solution with micropump during white light irradiation.

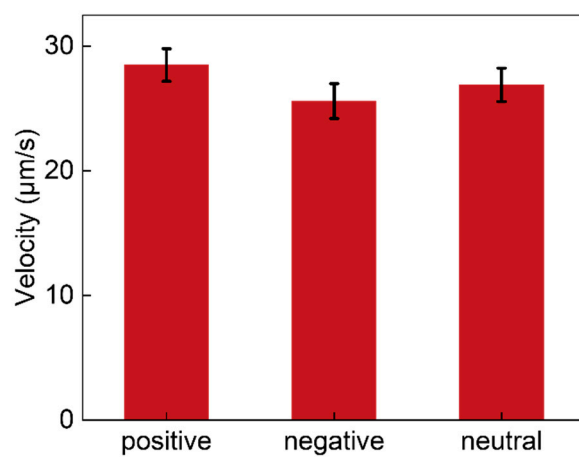

**Figure S2.** The velocity of the tracer particles with different electricity.
